# Supplementary material
Source: publisher site journal article supplement (https://www.dovepress.com/get_supplementary_file.php?f=493049.docx)
Supplement: Supplementary file 1 [file get_supplementary_file.php]

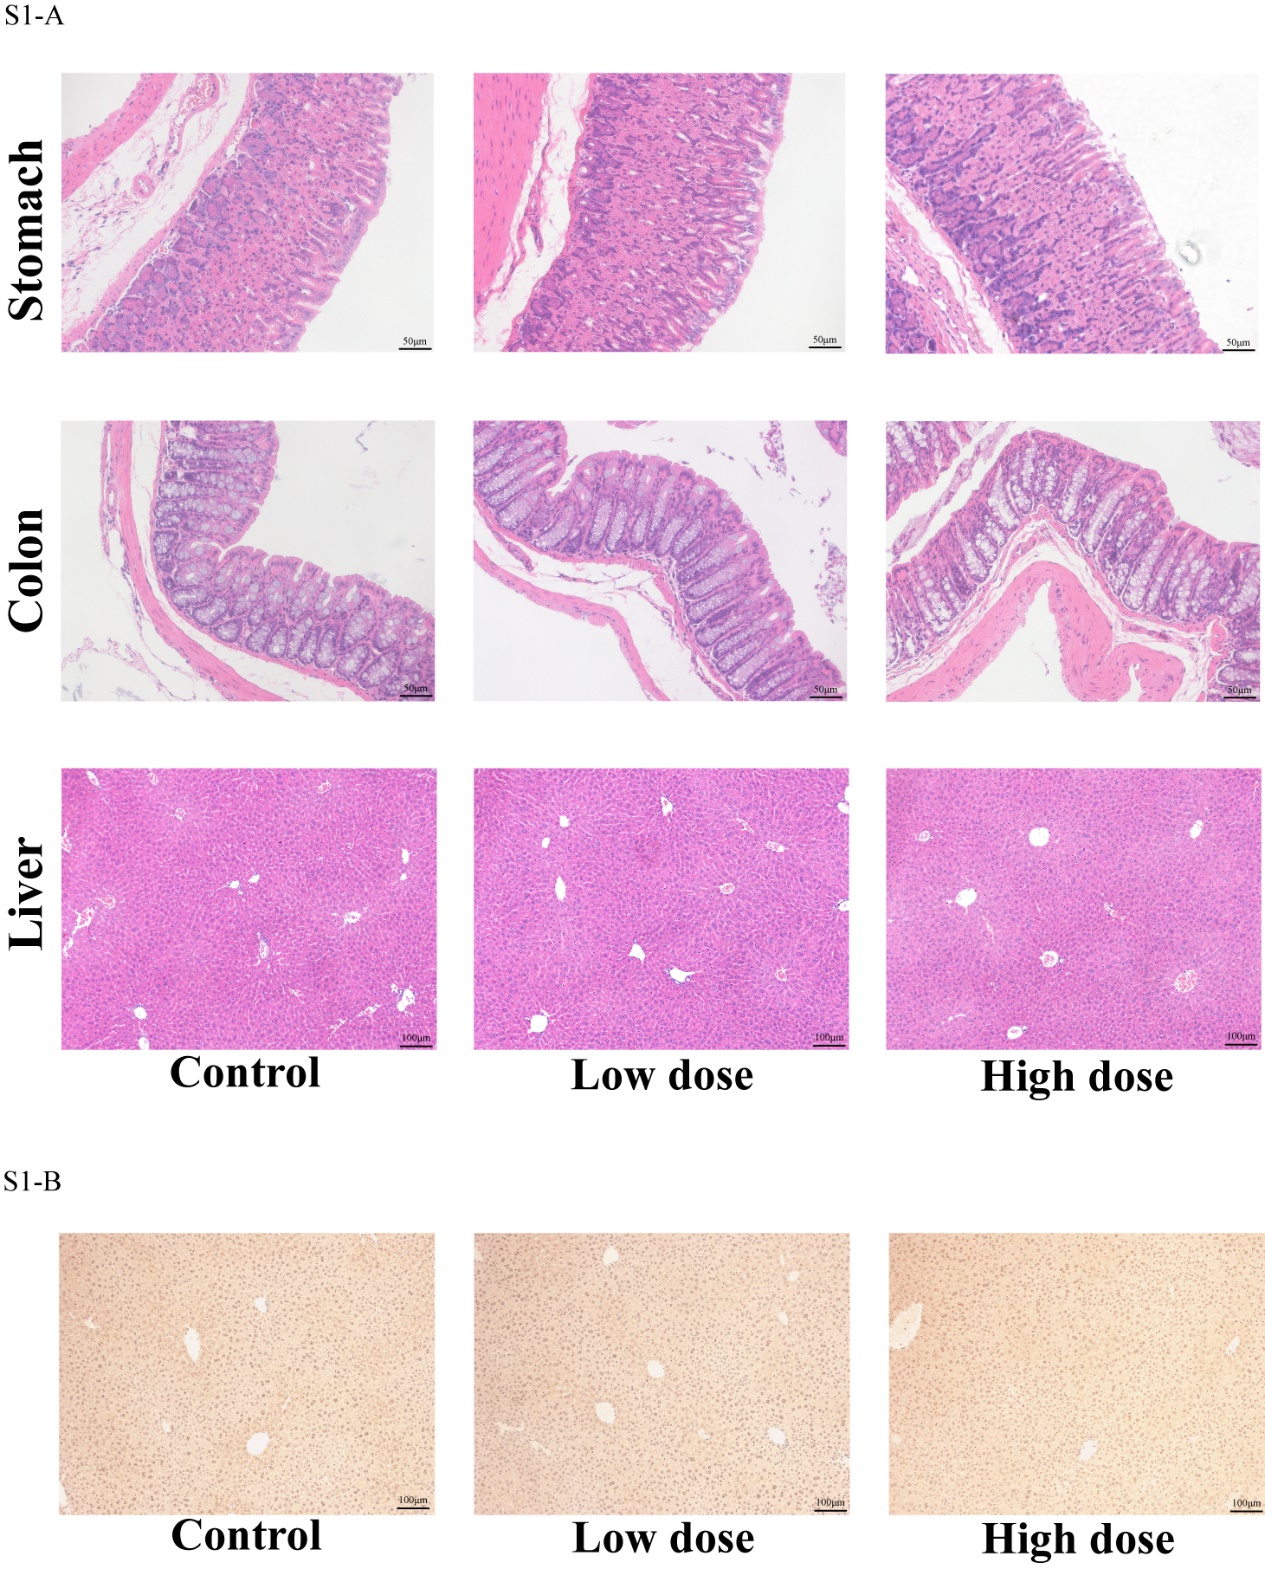


***Figure S1 H&E staining and immunohistochemistry results of other organs.***

***(A)*** HE staining of paraffin sections of stomach, colon and liver. n = 5 per group. For the stomach and colon, the magnification is 200X with a field of view diameter of 1.1 mm. For liver, the magnification is 100X with a field of view diameter of 2.2 mm. ***(B)*** Immunohistochemical staining of 4-hydroxynonenal (4-HNE) revealed the degree of lipid peroxidation of liver in each group. n = 5 per group. The magnification is 100X, and the field of view diameter is 2.2 mm.
